# Supplementary material
Source: Research Square preprint supplement (doi:10.21203/rs.3.rs-9163008/v1)
Supplement: Supplementary file 1 [file 101e93bb6afa35c324adaff5.docx]

**Supplementary Information**

**Imaging analysis**

High-resolution 3D T1-weighted images (TR = 2300 ms, TE = 2.98 ms, TI = 900 ms, FOV = 256 mm, voxel size = 1 × 1 × 1 mm3, matrix = 256 × 256, 192 slices, flip angle = 9°) were obtained using a Magnetization Prepared Rapid Gradient Echo (MPRAGE) sequence. Post-contrast T1-weighted images were acquired after injection of gadolinium contrast. T2-weighted images (TR = 3200 ms, TE = 408 ms, FOV = 230 mm, voxel size = 0.4 × 0.4 × 0.9 mm3, matrix = 256 × 256, 160 slices) and Fluid attenuated inversion recovery (FLAIR) images (TR = 5000 ms, TE = 386 ms, TI = 1800 ms, FOV = 256 mm, voxel size = 1 × 1 × 1 mm3, matrix = 256 × 256, 176 slices) were also acquired.

Supplementary Table 1. Full details of cognitive tests used. Individual Tests may have multiple scores.

| Cognitive domain | Test name | Score name | Abbreviation | Scoring | Description |
| --- | --- | --- | --- | --- | --- |
| Language | Picture naming and sentence reading | Picture naming | ocs_name_all | Correct names (max 4) | Names pictured objects to assess lexical retrieval. |
| Sentence reading | ocs_read | Words read correctly (max 15) | Measures reading fluency. |
| Semantics | ocs_name_sem | Correct semantic associations (max 3) | Tests understanding of word meanings. |
| Perception | Visual perception test | Visual Acuity | ocs_vision_tot | Total correct (max 18) | Assesses visual perception |
| Visual Extinction | ocs_vision_left | Score > 0 | Competing stimuli |
| Visual Extinction | ocs_vision_right | Score > 0 | Competing stimuli |
| Visual Field | ocs_VF | Score < 0 (Right) or > 0 (Left) | Presentation of stimuli in visual field |
| Numerical cognition | Calculation | Number writing | ocs_num_write | Number writing accuracy (max 3) | Writes numbers as dictated. |
| Calculation | ocs_num_calc | Correct answers (max 4) | Solves basic arithmetic problems. |
| Attention | Hearts cancellation | Hearts cancellation | ocs_hearts_acc | Accuracy (max 30) | Assesses cancellation of presented objects |
| Space asymmetry | ocs_hearts_spa | < -0.09 or > 0.09 | Assesses egocentric neglect by calculating cancellation of hearts between left/right sides |
| Object asymmetry | ocs_hearts_obj | < -1 or > 1 | Assesses allocentric neglect by calculating whether more left/right gap hearts are cancelled. |
| Perseveration | ocs_hearts_per | > 1 | Perseveration of cancellation task |
| Praxis | Gesture imitation | Hand gesture imitation | ocs_hand | Total correct (max 6) | Correct mirroring of three hand sequences |
| Finger gesture imitation | ocs_finger | Total correct (max 6) | Correct mirroring of three finger sequences |
| Overall gesture imitation | ocs_imit | Total correct (max 12) | Correct mirroring of hand and finger sequences |
| Memory | Orientation test | Orientation | ocs_orient | Correct answers (max 4) | Assesses awareness of time and place. |
| Sentence memory | Overall verbal memory | ocs_recall_all | Total correct (max 4) | Correct recognition and recall of a delayed sentence |
| Picture memory | Episodic memory | ocs_recall_epi | Total correct  (max 4) | Remembers previously seen pictures |
| Executive function | Hearts cancellation | Hearts organisation  index | ocs_hearts_org | No maximum | Lower score represents more organized search pattern |
| Circles and squaresTrail making test | Spatial attention and organisation | ocs_exec_sq | Total correct  (max 6) | Correct connection between circle shapes |
| Task switching | ocs_exec_alt | Total correct  (max 13) | Correct connection between circle shapes with triangle distractors |
| Perception | Postcard learning | Postcards objects | bridge_obj_per | Correct (max 6) | Naming and identifying objects on postcards. |
|  | Line bisection test | Line Bisection (BOAT) | bridge_line_mean | Deviation in mm | Assesses spatial bias via line midpoint judgment. |
| Emotional expressions picture test | Emotional expressions (AFT) | bridge_emotion | Correct (max 18) | Identifies facial emotional expressions. |
| Recognition memory | Face and object recognition test | Face recognition (FAB) | bridge_fab_fac | Correct (max 6), | Recognises previously seen faces. |
| Object recognition (FAB) | bridge_fab_hut | Correct  (max 6) | Recognises previously seen objects (beach huts) |
| Delayed object recognition | bridge_fabd_fac | Correct  (max 6) | Recognises previously seen faces. |
| Delayed object recognition | bridge_fabd_hut | Correct (max 6) | Recognises previously seen objects (beach huts) |
| Prospective Memory | Prospective picture memory | Postcards prospective | bridge_post_pro | Correct (max 4) | Tests ability to perform task based on visual cue |
| Postcards  retrospective | bridge_post_ret | Correct (max 4) | Tests ability to recognise visual information on cue |
| Attention | SALT Attention test | Sustained attention counting (SALT) | bridge_salt_tot | Correct counts (max 4) | Tests ability to count the number of brief visual cues |
| Target Detection (SALT) | bridge_salt_rttargets | Correct counts  (max 36) | Accuracy of detected brief visual cues |
| Target space Bias (SALT) | bridge_salt_bias | Positive scores indicate left sided space neglect | Accuracy of responses to brief visual cues between left/right space |
| Reaction time space bias (SALT) | bridge_salt_RTbias | Positive scores indicate left sided space neglect | Response times to brief visual cues between left/right space |
| Consistency of attention | bridge_salt_RTc | Higher scores indicate more  variable reaction times | Consistency of attention measured as the coefficient of variation in response times |
| Verbal working memory | Digit span test | Forward Digit Span (FINS) | bridge_digit_for | Max digit span forward (max 11) | Measures short-term verbal memory. |
| Backward Digit Span (FINS) | bridge_digit_bac | Max digit span backward (max 11) | Measures verbal working memory. |

Supplementary Table 2. Clinical characteristics by type of surgery.

| Characteristic | Biopsy  n = 61 | Resection  n = 381 | p-value2 | q-value3 |
| --- | --- | --- | --- | --- |
| Age | 63.8 (55.6, 66.8) | 62.4 (53.2, 68.2) | 0.8 | >0.9 |
| Sex |  |  | 0.6 | >0.9 |
|  | 0 (0%) | 0 (0%) |  |  |
| Female | 1 (17%) | 13 (34%) |  |  |
| Male | 5 (83%) | 25 (66%) |  |  |
| Hand dominance |  |  | >0.9 | >0.9 |
| Left | 1 (17%) | 5 (13%) |  |  |
| Right | 5 (83%) | 33 (87%) |  |  |
| WHO performance |  |  | 0.010 | 0.2 |
| 0 | 3 (50%) | 18 (47%) |  |  |
| 1 | 1 (17%) | 20 (53%) |  |  |
| 2 | 2 (33%) | 0 (0%) |  |  |
| Education (years) | 15.5 (11.0, 18.0) | 16.0 (13.0, 19.0) | 0.5 | >0.9 |
| Tumour side |  |  | >0.9 | >0.9 |
| Left | 3 (50%) | 19 (50%) |  |  |
| Right | 3 (50%) | 19 (50%) |  |  |
| Lobe |  |  | 0.017 | 0.2 |
| Frontal | 3 (50%) | 17 (45%) |  |  |
| Occipital | 2 (33%) | 0 (0%) |  |  |
| Parietal | 0 (0%) | 8 (21%) |  |  |
| Temporal | 1 (17%) | 13 (34%) |  |  |
| Lesion volume (cc) | 21.0 (16.9, 39.7) | 35.0 (16.0, 50.0) | 0.2 | 0.8 |
| Awake | 0 (0%) | 6 (16%) | 0.6 | >0.9 |
| Neurophysiology | 0 (0%) | 21 (55%) | 0.022 | 0.2 |
| Complication | 0 (0%) | 6 (16%) | 0.6 | >0.9 |
| Preop AED (mg) | 0 (0, 1,000) | 0 (0, 0) | 0.4 | >0.9 |
| Postop AED (mg) | 0 (0, 1,000) | 0 (0, 0) | 0.4 | >0.9 |
| Steroid (mg) | 5 (4, 16) | 5 (4, 8) | >0.9 | >0.9 |
| IDH |  |  | >0.9 | >0.9 |
| Mutant | 0 (0%) | 1 (2.6%) |  |  |
| Wildtype | 6 (100%) | 37 (97%) |  |  |
| MGMT |  |  | >0.9 | >0.9 |
| Methylated | 3 (50%) | 20 (53%) |  |  |
| Unmethylated | 3 (50%) | 18 (47%) |  |  |
| Pathology |  |  | >0.9 | >0.9 |
| Glioblastoma | 6 (100%) | 35 (92%) |  |  |
| Gliosarcoma | 0 (0%) | 3 (7.9%) |  |  |
| Radiotherapy | 2 (33%) | 30 (79%) | 0.039 | 0.2 |
| Chemotherapy | 2 (33%) | 26 (68%) | 0.2 | 0.7 |
| GAD anxiety | 2.0 (1.0, 5.0) | 4.5 (2.0, 7.0) | 0.4 | >0.9 |
| PHQ depression | 2.0 (1.0, 5.0) | 4.5 (2.0, 8.0) | 0.3 | >0.9 |
| Preop FLAIR volume (cc) | 28 (8, 54) | 15 (9, 39) | 0.6 | >0.9 |
| 1Median (IQR) or Frequency (%) | | | | |
| 2Wilcoxon rank sum exact test; Fisher's exact test; Wilcoxon rank sum test | | | | |
| 3False discovery rate correction for multiple testing | | | | |

Supplementary Table 3. Clinical characteristics by patients who completed NPS.

| Characteristic | Completer  N = 251 | Non-completer  N = 191 | p-value2 | q-value3 |
| --- | --- | --- | --- | --- |
| Age | 59.3 (51.8, 65.5) | 66.8 (59.9, 73.3) | 0.034 | 0.5 |
| Sex |  |  | 0.5 | 0.8 |
|  | 0 (0%) | 0 (0%) |  |  |
| Female | 9 (36%) | 5 (26%) |  |  |
| Male | 16 (64%) | 14 (74%) |  |  |
| Education (years) | 17.0 (14.0, 19.0) | 15.0 (12.0, 16.0) | 0.074 | 0.5 |
| Hand dominance |  |  | 0.4 | 0.6 |
| Left | 2 (8.0%) | 4 (21%) |  |  |
| Right | 23 (92%) | 15 (79%) |  |  |
| WHO performance status |  |  | 0.7 | 0.8 |
| 0 | 11 (44%) | 10 (53%) |  |  |
| 1 | 12 (48%) | 9 (47%) |  |  |
| 2 | 2 (8.0%) | 0 (0%) |  |  |
| Tumour side |  |  | 0.4 | 0.6 |
| Left | 11 (44%) | 11 (58%) |  |  |
| Right | 14 (56%) | 8 (42%) |  |  |
| Lobe |  |  | 0.3 | 0.6 |
| Frontal | 9 (36%) | 11 (58%) |  |  |
| Occipital | 2 (8.0%) | 0 (0%) |  |  |
| Parietal | 4 (16%) | 4 (21%) |  |  |
| Temporal | 10 (40%) | 4 (21%) |  |  |
| Lesion volume (cc) | 25.0 (16.0, 41.6) | 41.7 (29.8, 53.1) | 0.093 | 0.5 |
| Preop FLAIR volume (cc) | 19 (10, 54) | 14 (9, 35) | 0.4 | 0.7 |
| Surgery type |  |  | 0.2 | 0.6 |
| Biopsy | 5 (20%) | 1 (5.3%) |  |  |
| Resection | 20 (80%) | 18 (95%) |  |  |
| Awake surgery | 5 (20%) | 1 (5.3%) | 0.2 | 0.6 |
| Neurophysiology | 13 (52%) | 8 (42%) | 0.5 | 0.8 |
| Complication | 3 (12%) | 3 (16%) | >0.9 | >0.9 |
| Preop AED (mg) | 0 (0, 1,000) | 0 (0, 0) | 0.3 | 0.6 |
| Steroid (mg) | 6 (4, 8) | 4 (4, 8) | 0.4 | 0.6 |
| Pathology |  |  | 0.073 | 0.5 |
| Glioblastoma | 25 (100%) | 16 (84%) |  |  |
| Gliosarcoma | 0 (0%) | 3 (16%) |  |  |
| IDH status |  |  | >0.9 | >0.9 |
| Mutant | 1 (4.0%) | 0 (0%) |  |  |
| Wildtype | 24 (96%) | 19 (100%) |  |  |
| MGMT status |  |  | 0.6 | 0.8 |
| Methylated | 14 (56%) | 9 (47%) |  |  |
| Unmethylated | 11 (44%) | 10 (53%) |  |  |
| GAD anxiety | 3.0 (2.0, 6.0) | 5.0 (1.0, 9.0) | 0.7 | 0.8 |
| PHQ depression | 5.0 (1.0, 9.0) | 3.0 (2.0, 8.0) | >0.9 | >0.9 |
| Pre-operative cluster |  |  | 0.3 | 0.6 |
| Minimal deficit | 16 (64%) | 7 (37%) |  |  |
| Mild deficit | 5 (20%) | 7 (37%) |  |  |
| Moderate deficit | 2 (8.0%) | 3 (16%) |  |  |
| Severe deficit | 2 (8.0%) | 2 (11%) |  |  |
| Transient deficit | 0 (0%) | 0 (0%) |  |  |
| Baseline RC1 | 1.53 (0.39, 1.88) | 0.17 (-0.43, 1.46) | 0.11 | 0.5 |
| Baseline RC2 | 0.22 (-0.78, 0.92) | 0.04 (-0.98, 1.47) | 0.7 | 0.8 |
| Baseline RC3 | 0.28 (-0.19, 0.70) | -0.08 (-2.02, 0.98) | 0.4 | 0.6 |
| 1Median (IQR) or Frequency (%) | | | | |
| 2Wilcoxon rank sum exact test; Fisher's exact test; Wilcoxon rank sum test; Pearson's Chi-squared test | | | | |
| 3False discovery rate correction for multiple testing | | | | |

Supplementary Table 4. Percentage of patients with impairment by type of surgery.

| Timepoint | Domain | Biopsy  (n) | Resection  (n) | Biopsy  Impaired  (%) | Resection  Impaired  (%) | p-value1 | q-value2 |
| --- | --- | --- | --- | --- | --- | --- | --- |
| t0 | Calculation | 6 | 38 | 83.3 | 31.6 | 0.025 | 0.650 |
| Perception | 6 | 38 | 83.3 | 36.8 | 0.070 | 0.650 |
| Attention | 6 | 38 | 16.7 | 50.0 | 0.198 | 0.743 |
| Executive Function | 6 | 38 | 50.0 | 26.3 | 0.339 | 0.910 |
| Prospective Memory | 6 | 38 | 50.0 | 28.9 | 0.364 | 0.910 |
| Verbal Working Memory | 6 | 38 | 16.7 | 10.5 | 0.538 | 0.971 |
| Memory | 6 | 38 | 50.0 | 36.8 | 0.662 | 0.971 |
| Recognition Memory | 6 | 38 | 50.0 | 36.8 | 0.662 | 0.971 |
| Language | 6 | 38 | 33.3 | 28.9 | 1.000 | 1.000 |
| Praxis | 6 | 38 | 16.7 | 26.3 | 1.000 | 1.000 |
| t1 | Prospective Memory | 6 | 30 | 66.7 | 33.3 | 0.181 | 0.743 |
| Verbal Working Memory | 6 | 30 | 50.0 | 26.7 | 0.343 | 0.910 |
| Language | 6 | 32 | 33.3 | 56.2 | 0.395 | 0.912 |
| Perception | 6 | 32 | 100.0 | 84.4 | 0.570 | 0.971 |
| Memory | 6 | 32 | 66.7 | 50.0 | 0.663 | 0.971 |
| Recognition Memory | 6 | 31 | 50.0 | 61.3 | 0.670 | 0.971 |
| Praxis | 6 | 31 | 33.3 | 45.2 | 0.680 | 0.971 |
| Attention | 6 | 32 | 66.7 | 71.9 | 1.000 | 1.000 |
| Executive Function | 6 | 32 | 50.0 | 50.0 | 1.000 | 1.000 |
| Calculation | 6 | 32 | 83.3 | 75.0 | 1.000 | 1.000 |
| t2 | Calculation | 5 | 24 | 100.0 | 50.0 | 0.059 | 0.650 |
| Language | 5 | 24 | 60.0 | 20.8 | 0.112 | 0.650 |
| Memory | 5 | 24 | 40.0 | 8.3 | 0.127 | 0.650 |
| Executive Function | 5 | 24 | 80.0 | 33.3 | 0.130 | 0.650 |
| Perception | 5 | 24 | 80.0 | 45.8 | 0.330 | 0.910 |
| Prospective Memory | 5 | 24 | 40.0 | 25.0 | 0.597 | 0.971 |
| Attention | 5 | 24 | 60.0 | 58.3 | 1.000 | 1.000 |
| Praxis | 5 | 23 | 40.0 | 30.4 | 1.000 | 1.000 |
| Verbal Working Memory | 5 | 24 | 20.0 | 16.7 | 1.000 | 1.000 |
| Recognition Memory | 5 | 24 | 40.0 | 37.5 | 1.000 | 1.000 |

1Fisher's exact test

2False discovery rate correction for multiple testing

Supplementary Table 5. Percentage of patients with preoperative impairment by tumour hemisphere.

| Timepoint | Domain | n (Left) | % Impaired (Left) | n (Right) | % Impaired (Right) | p-value1 | q-value2 |
| --- | --- | --- | --- | --- | --- | --- | --- |
| t0 | Calculation | 22 | 22.7 | 22 | 54.5 | 0.062 | 0.93 |
| Prospective Memory | 22 | 45.5 | 22 | 18.2 | 0.104 | 1.00 |
| Praxis | 22 | 31.8 | 22 | 18.2 | 0.488 | 1.00 |
| Executive Function | 22 | 22.7 | 22 | 36.4 | 0.510 | 1.00 |
| Recognition Memory | 22 | 45.5 | 22 | 31.8 | 0.537 | 1.00 |
| Attention | 22 | 50.0 | 22 | 40.9 | 0.763 | 1.00 |
| Perception | 22 | 45.5 | 22 | 40.9 | 1.000 | 1.00 |
| Memory | 22 | 40.9 | 22 | 36.4 | 1.000 | 1.00 |
| Language | 22 | 31.8 | 22 | 27.3 | 1.000 | 1.00 |
| Verbal Working Memory | 22 | 13.6 | 22 | 9.1 | 1.000 | 1.00 |
| t1 | Executive Function | 18 | 27.8 | 20 | 70.0 | 0.022 | 0.66 |
| Prospective Memory | 17 | 52.9 | 19 | 26.3 | 0.171 | 1.00 |
| Recognition Memory | 18 | 50.0 | 19 | 68.4 | 0.325 | 1.00 |
| Memory | 18 | 61.1 | 20 | 45.0 | 0.352 | 1.00 |
| Language | 18 | 61.1 | 20 | 45.0 | 0.352 | 1.00 |
| Verbal Working Memory | 17 | 35.3 | 19 | 26.3 | 0.721 | 1.00 |
| Attention | 18 | 66.7 | 20 | 75.0 | 0.724 | 1.00 |
| Praxis | 17 | 47.1 | 20 | 40.0 | 0.746 | 1.00 |
| Perception | 18 | 88.9 | 20 | 85.0 | 1.000 | 1.00 |
| Calculation | 18 | 77.8 | 20 | 75.0 | 1.000 | 1.00 |
| t2 | Attention | 13 | 46.2 | 16 | 68.8 | 0.274 | 1.00 |
| Memory | 13 | 23.1 | 16 | 6.2 | 0.299 | 1.00 |
| Language | 13 | 38.5 | 16 | 18.8 | 0.406 | 1.00 |
| Prospective Memory | 13 | 38.5 | 16 | 18.8 | 0.406 | 1.00 |
| Praxis | 13 | 23.1 | 15 | 40.0 | 0.435 | 1.00 |
| Calculation | 13 | 69.2 | 16 | 50.0 | 0.451 | 1.00 |
| Executive Function | 13 | 38.5 | 16 | 43.8 | 1.000 | 1.00 |
| Perception | 13 | 53.8 | 16 | 50.0 | 1.000 | 1.00 |
| Verbal Working Memory | 13 | 15.4 | 16 | 18.8 | 1.000 | 1.00 |
| Recognition Memory | 13 | 38.5 | 16 | 37.5 | 1.000 | 1.00 |

1Fisher's exact test

2False discovery rate correction for multiple testing

Supplementary Figure 1. Shankey plot showing the percentage of patients classified as impaired.








Supplementary Figure 2. Heatmap showing the significant changes in impairment classification across time by cognitive domain.

**

**

Supplementary Figure 3. Reliable change index (RCI) individual change across cognitive tests for resection patients (n = 38).





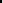

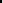
**
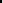
**Supplementary Table 6. Percentage of patients with improvement at each timepoint (n = 44).

| Domain | improved_t0_t1  (n) | t0_t1  (%) | improved_t1_t2  (n) | t1_t2  (%) | t0_t1 and t1_t2  (n) | t0_t1 and t1_t2  (%) | p-value | q-value |
| --- | --- | --- | --- | --- | --- | --- | --- | --- |
| Attention | 30 | 78.9 | 17 | 44.7 | 16 | 42.1 | 0.002 | 0.006* |
| Executive function | 24 | 63.2 | 14 | 36.8 | 11 | 28.9 | 0.024 | 0.040* |
| Perception | 17 | 44.7 | 6 | 15.8 | 4 | 10.5 | 0.010 | 0.022* |
| Memory | 5 | 13.2 | 6 | 15.8 | 0 | 0.0 | 1.000 | 1.000 |
| Language | 2 | 5.3 | 10 | 26.3 | 1 | 2.6 | 0.027 | 0.040* |
| Praxis | 6 | 15.8 | 6 | 15.8 | 1 | 2.6 | 1.000 | 1.000 |
| Calculation | 2 | 5.3 | 20 | 52.6 | 1 | 2.6 | 0.000 | 0.001* |
| Verbal working memory | 5 | 13.2 | 14 | 36.8 | 2 | 5.3 | 0.039 | 0.050 |
| Recognition memory | 27 | 71.1 | 5 | 13.2 | 5 | 13.2 | 0.000 | 0.000* |
| Prospective memory | 6 | 15.8 | 0 | 0.0 | 0 | 0.0 |  |  |

Supplementary Figure 4. Scree plot for PCA.





Supplementary Figure 5. Tests loading on each rotated component.





Supplementary Figure 6. Gaussian mixture model plot of Uncertainty estimates for A) t0, B) t1 and C) t2 and D) BIC against number of components. Abbreviations: BIC = Bayesian information criterion, G = Group.

1. T0: G = 4, ellipsoidal, equal volume and orientation (EVE) log-likelihood −198.9, BIC −500.0, mean posterior probability 0.98.


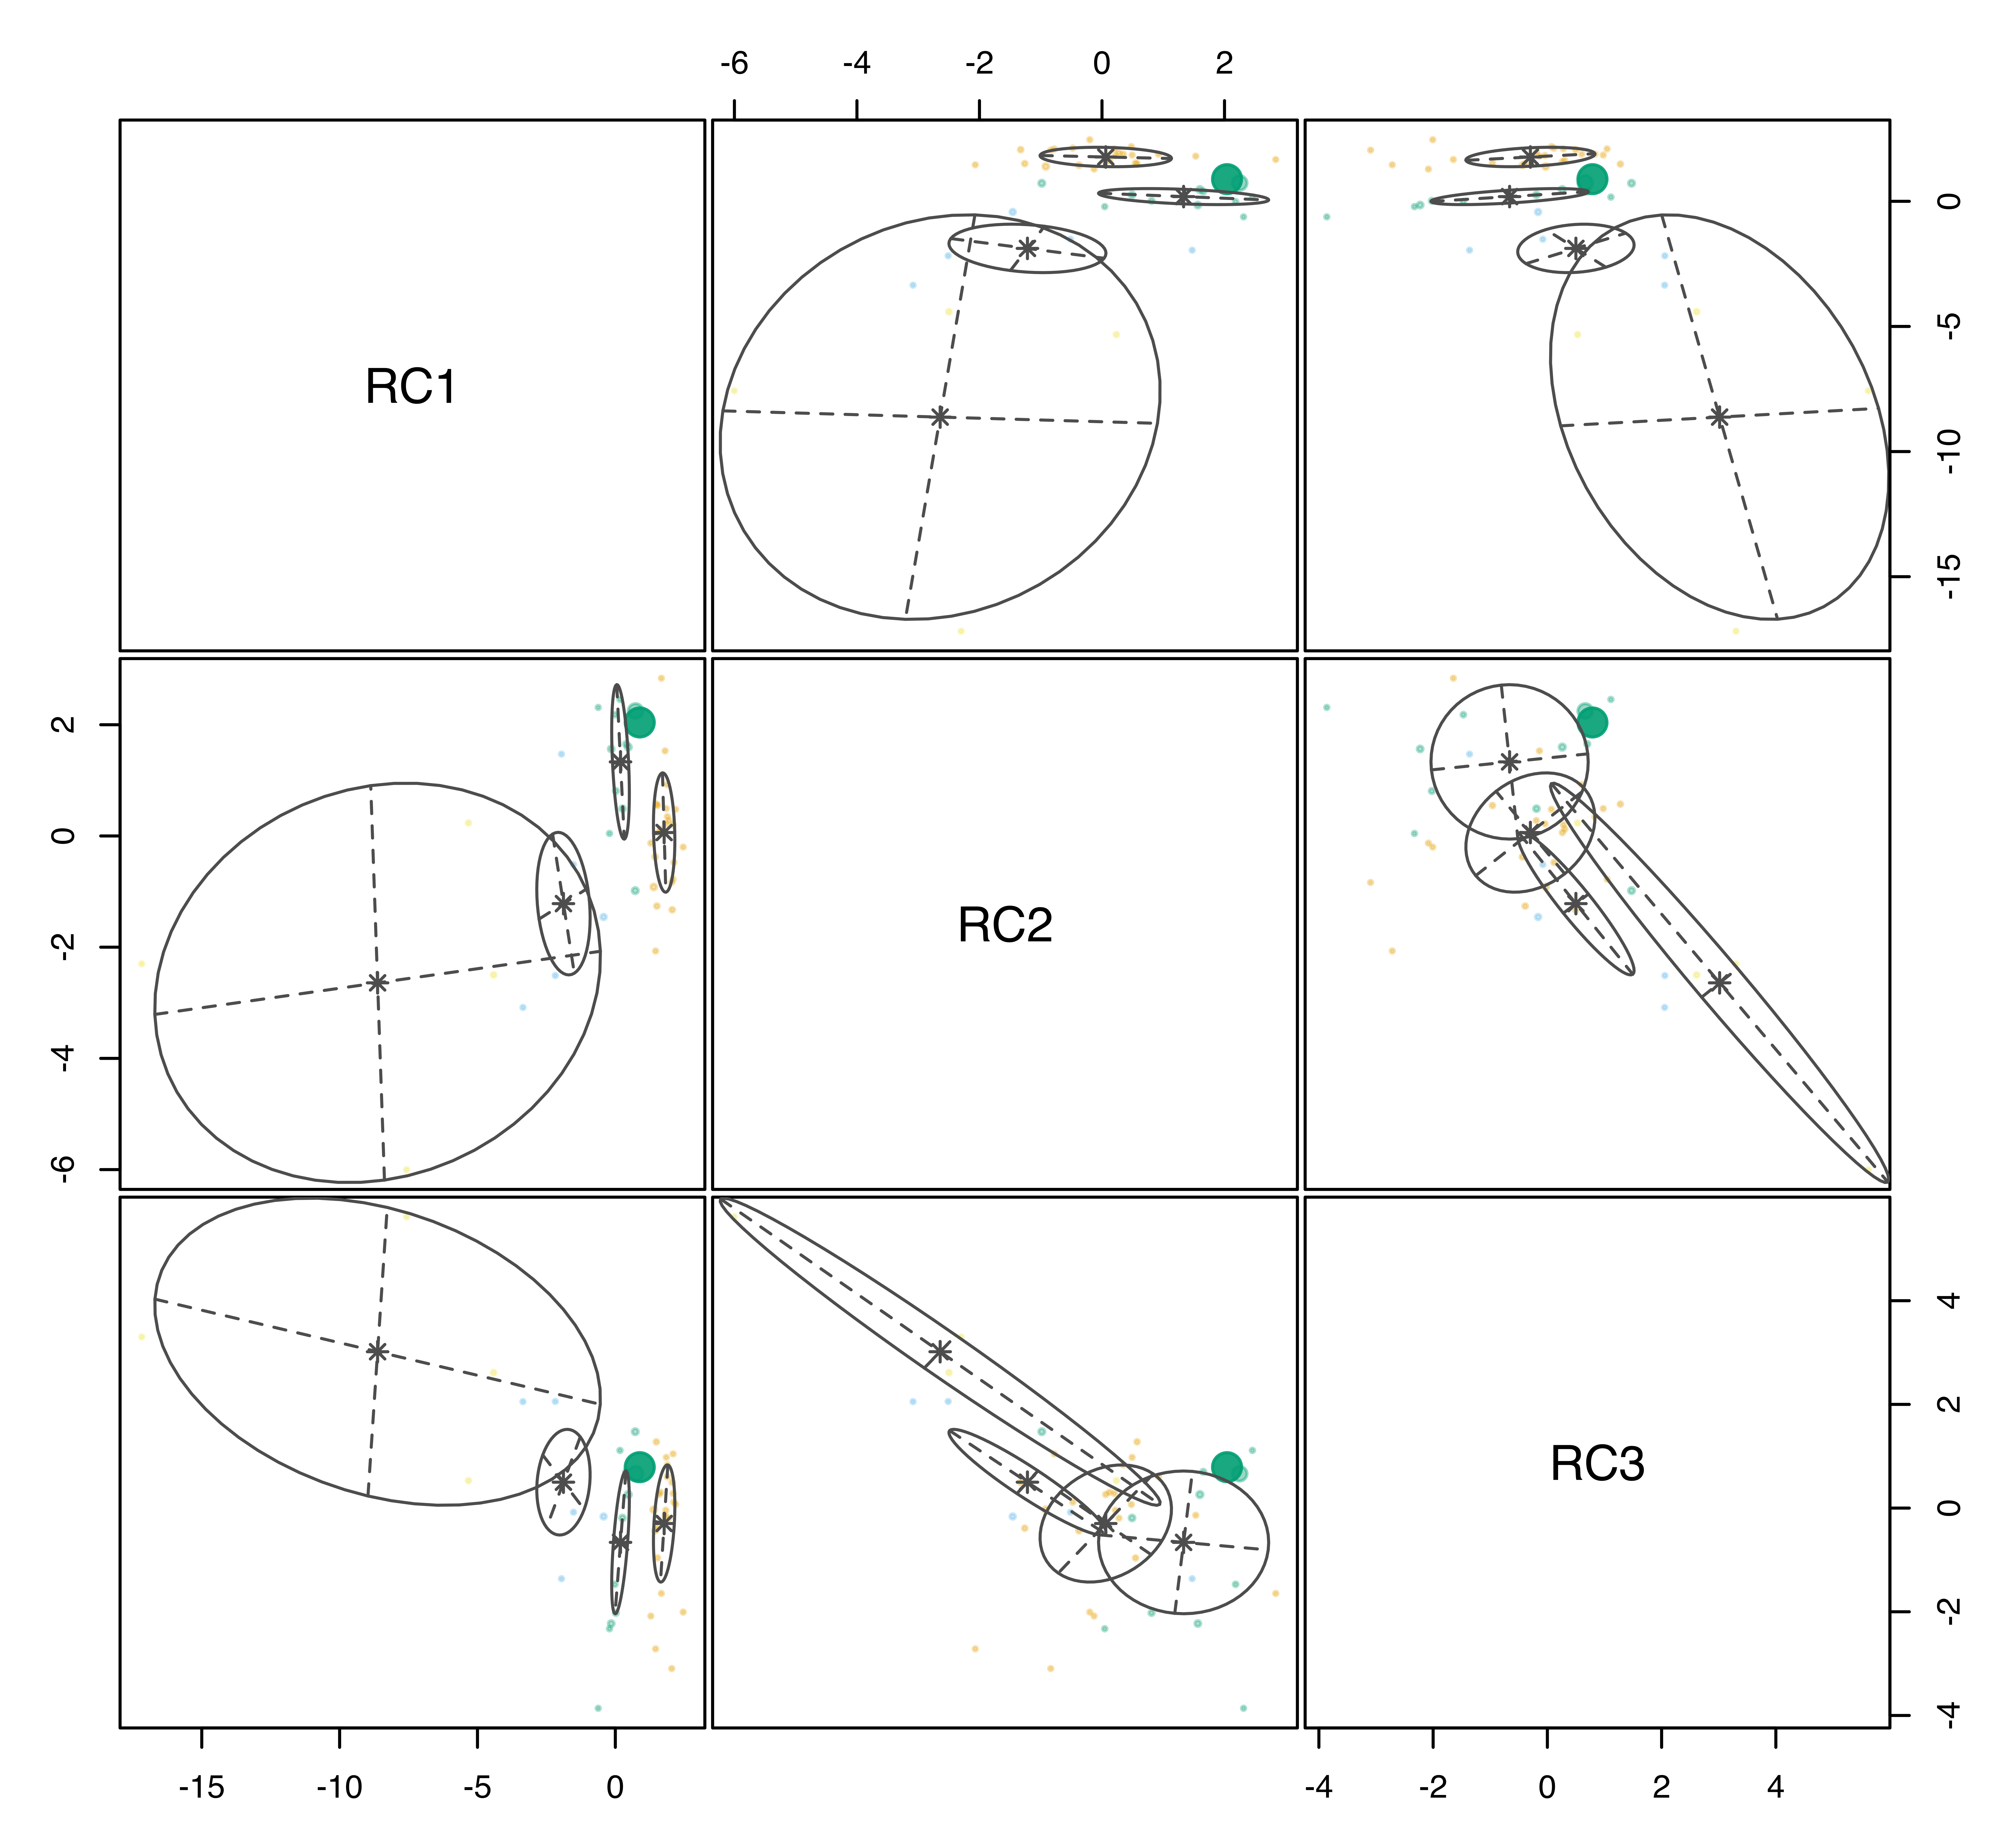


1. T1: G = 6, ellipsoidal, equal volume and shape (EEV) log-likelihood −139.3, BIC −435.1, mean posterior probability 1.0.


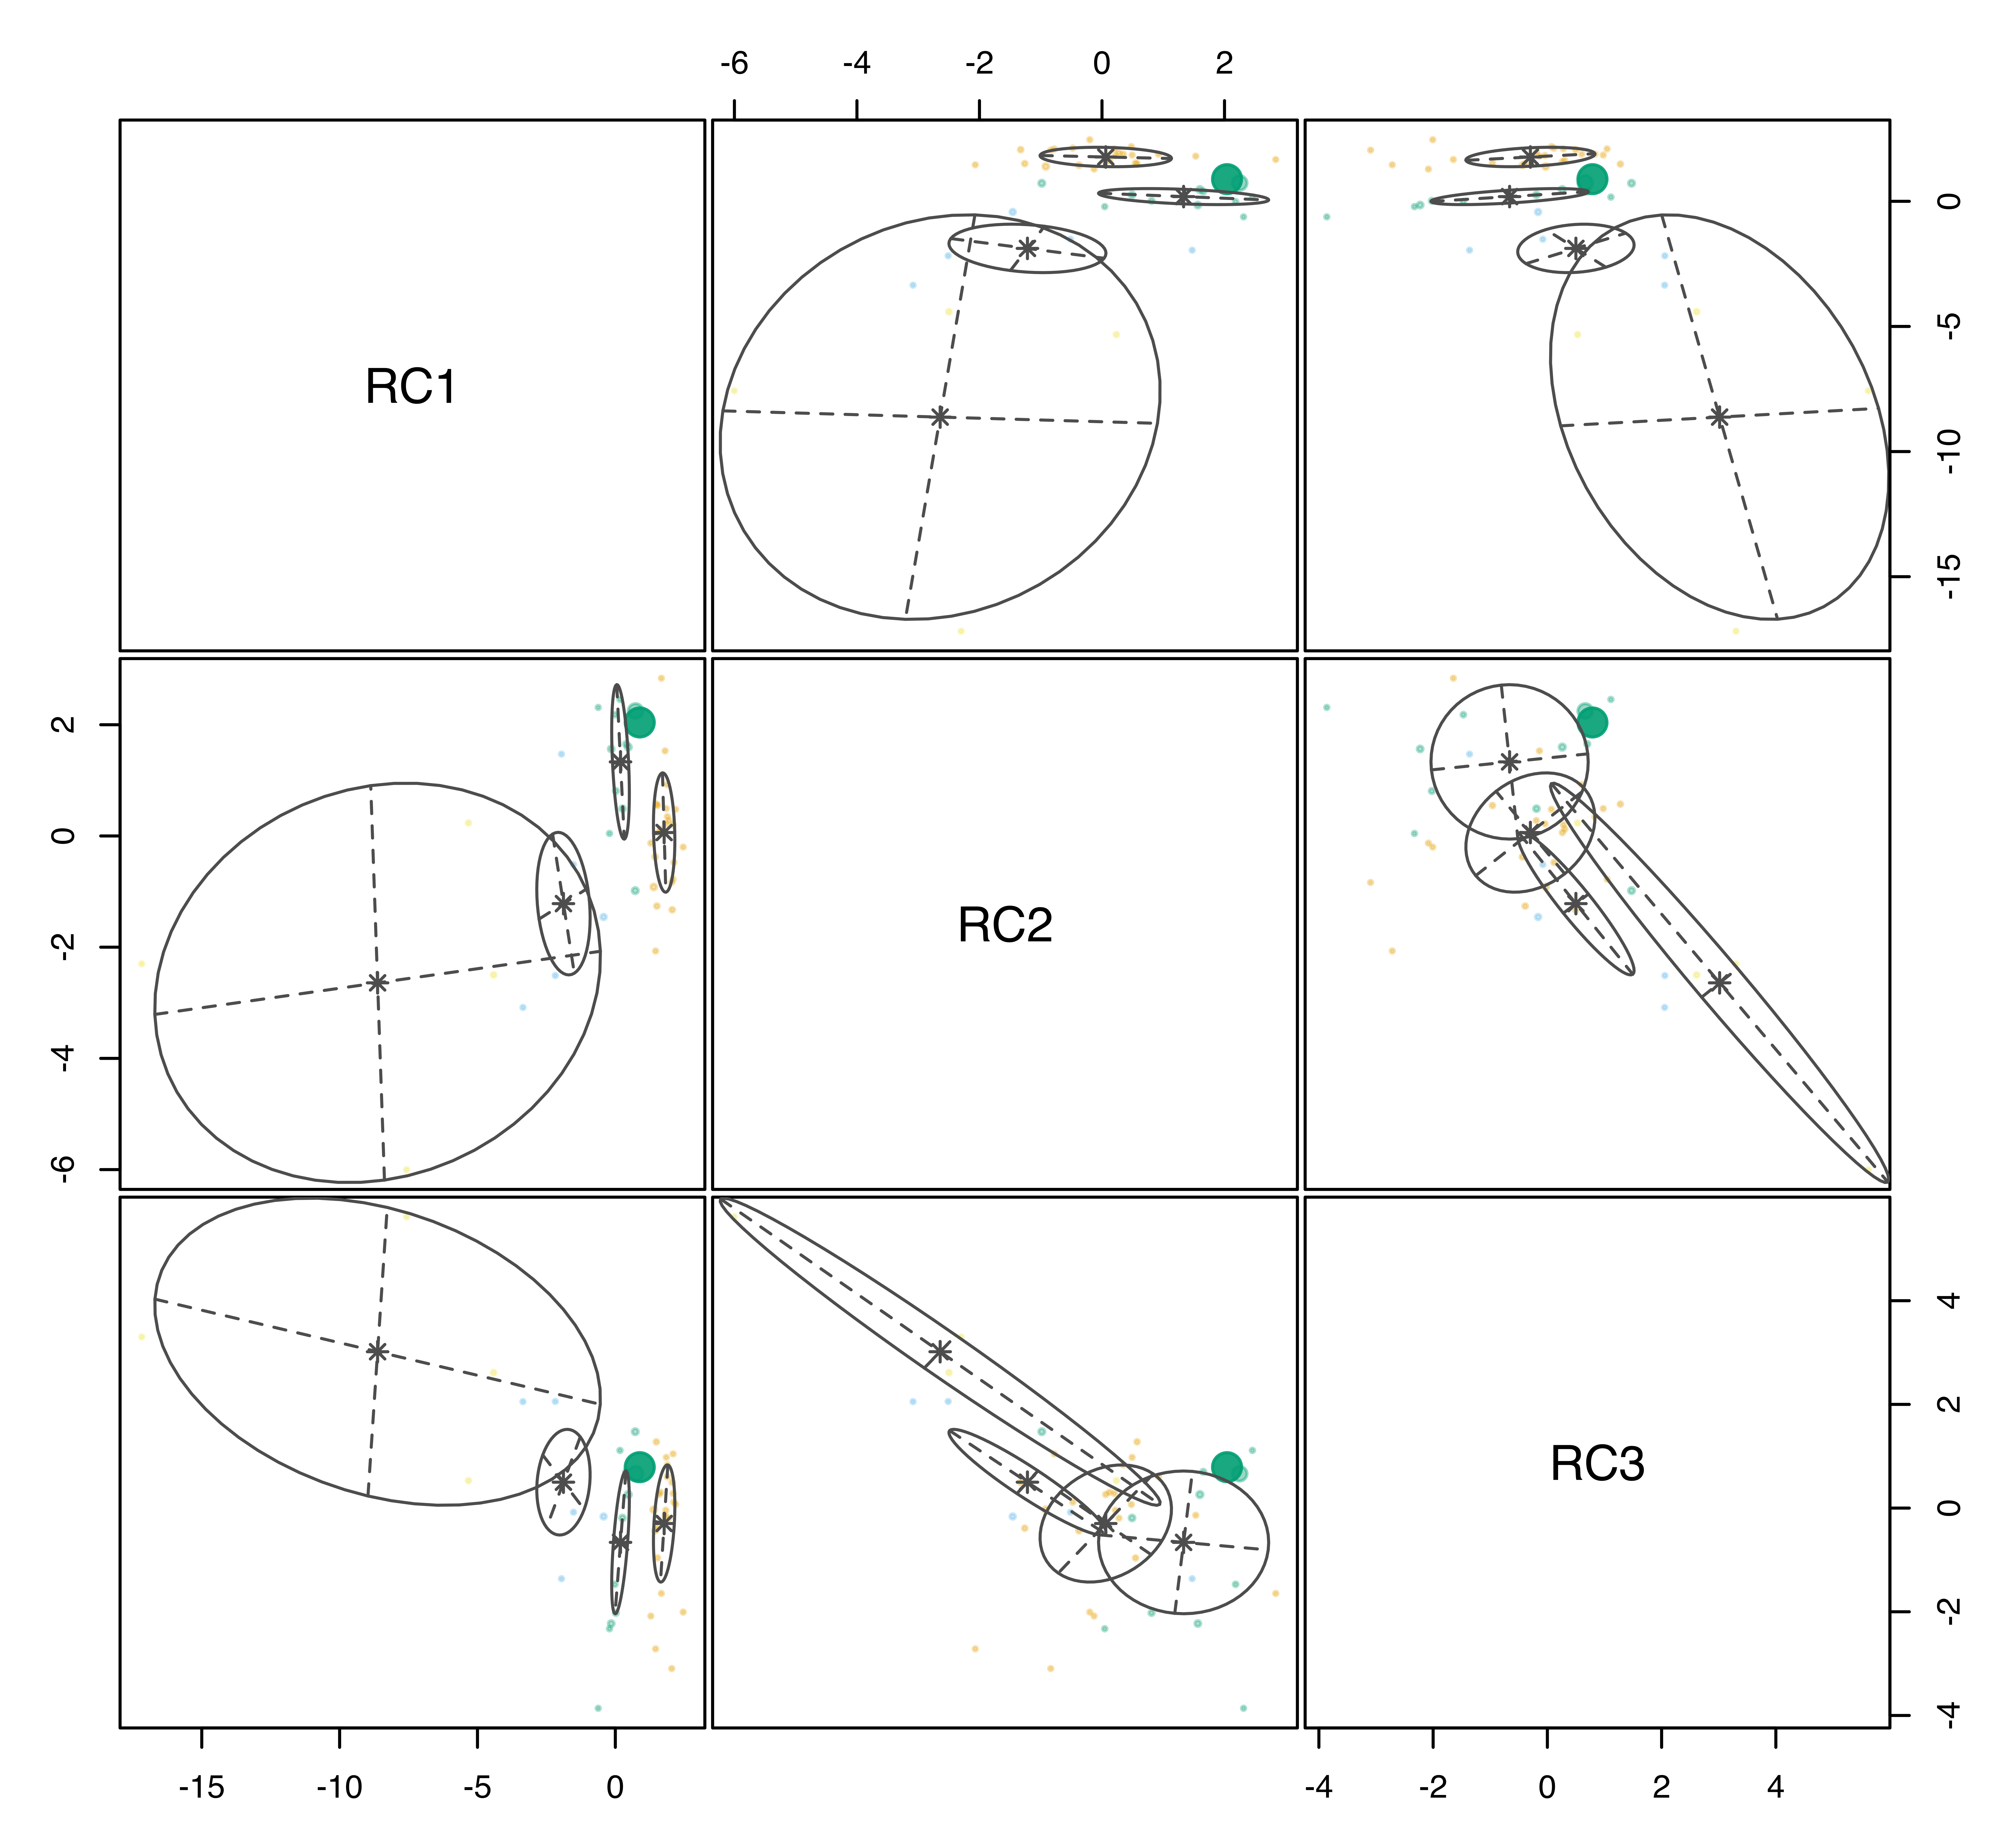


1. T2: G = 2, spherical, varying volume (VII) log-likelihood −122.6, BIC −274.8, mean posterior probability 0.98.


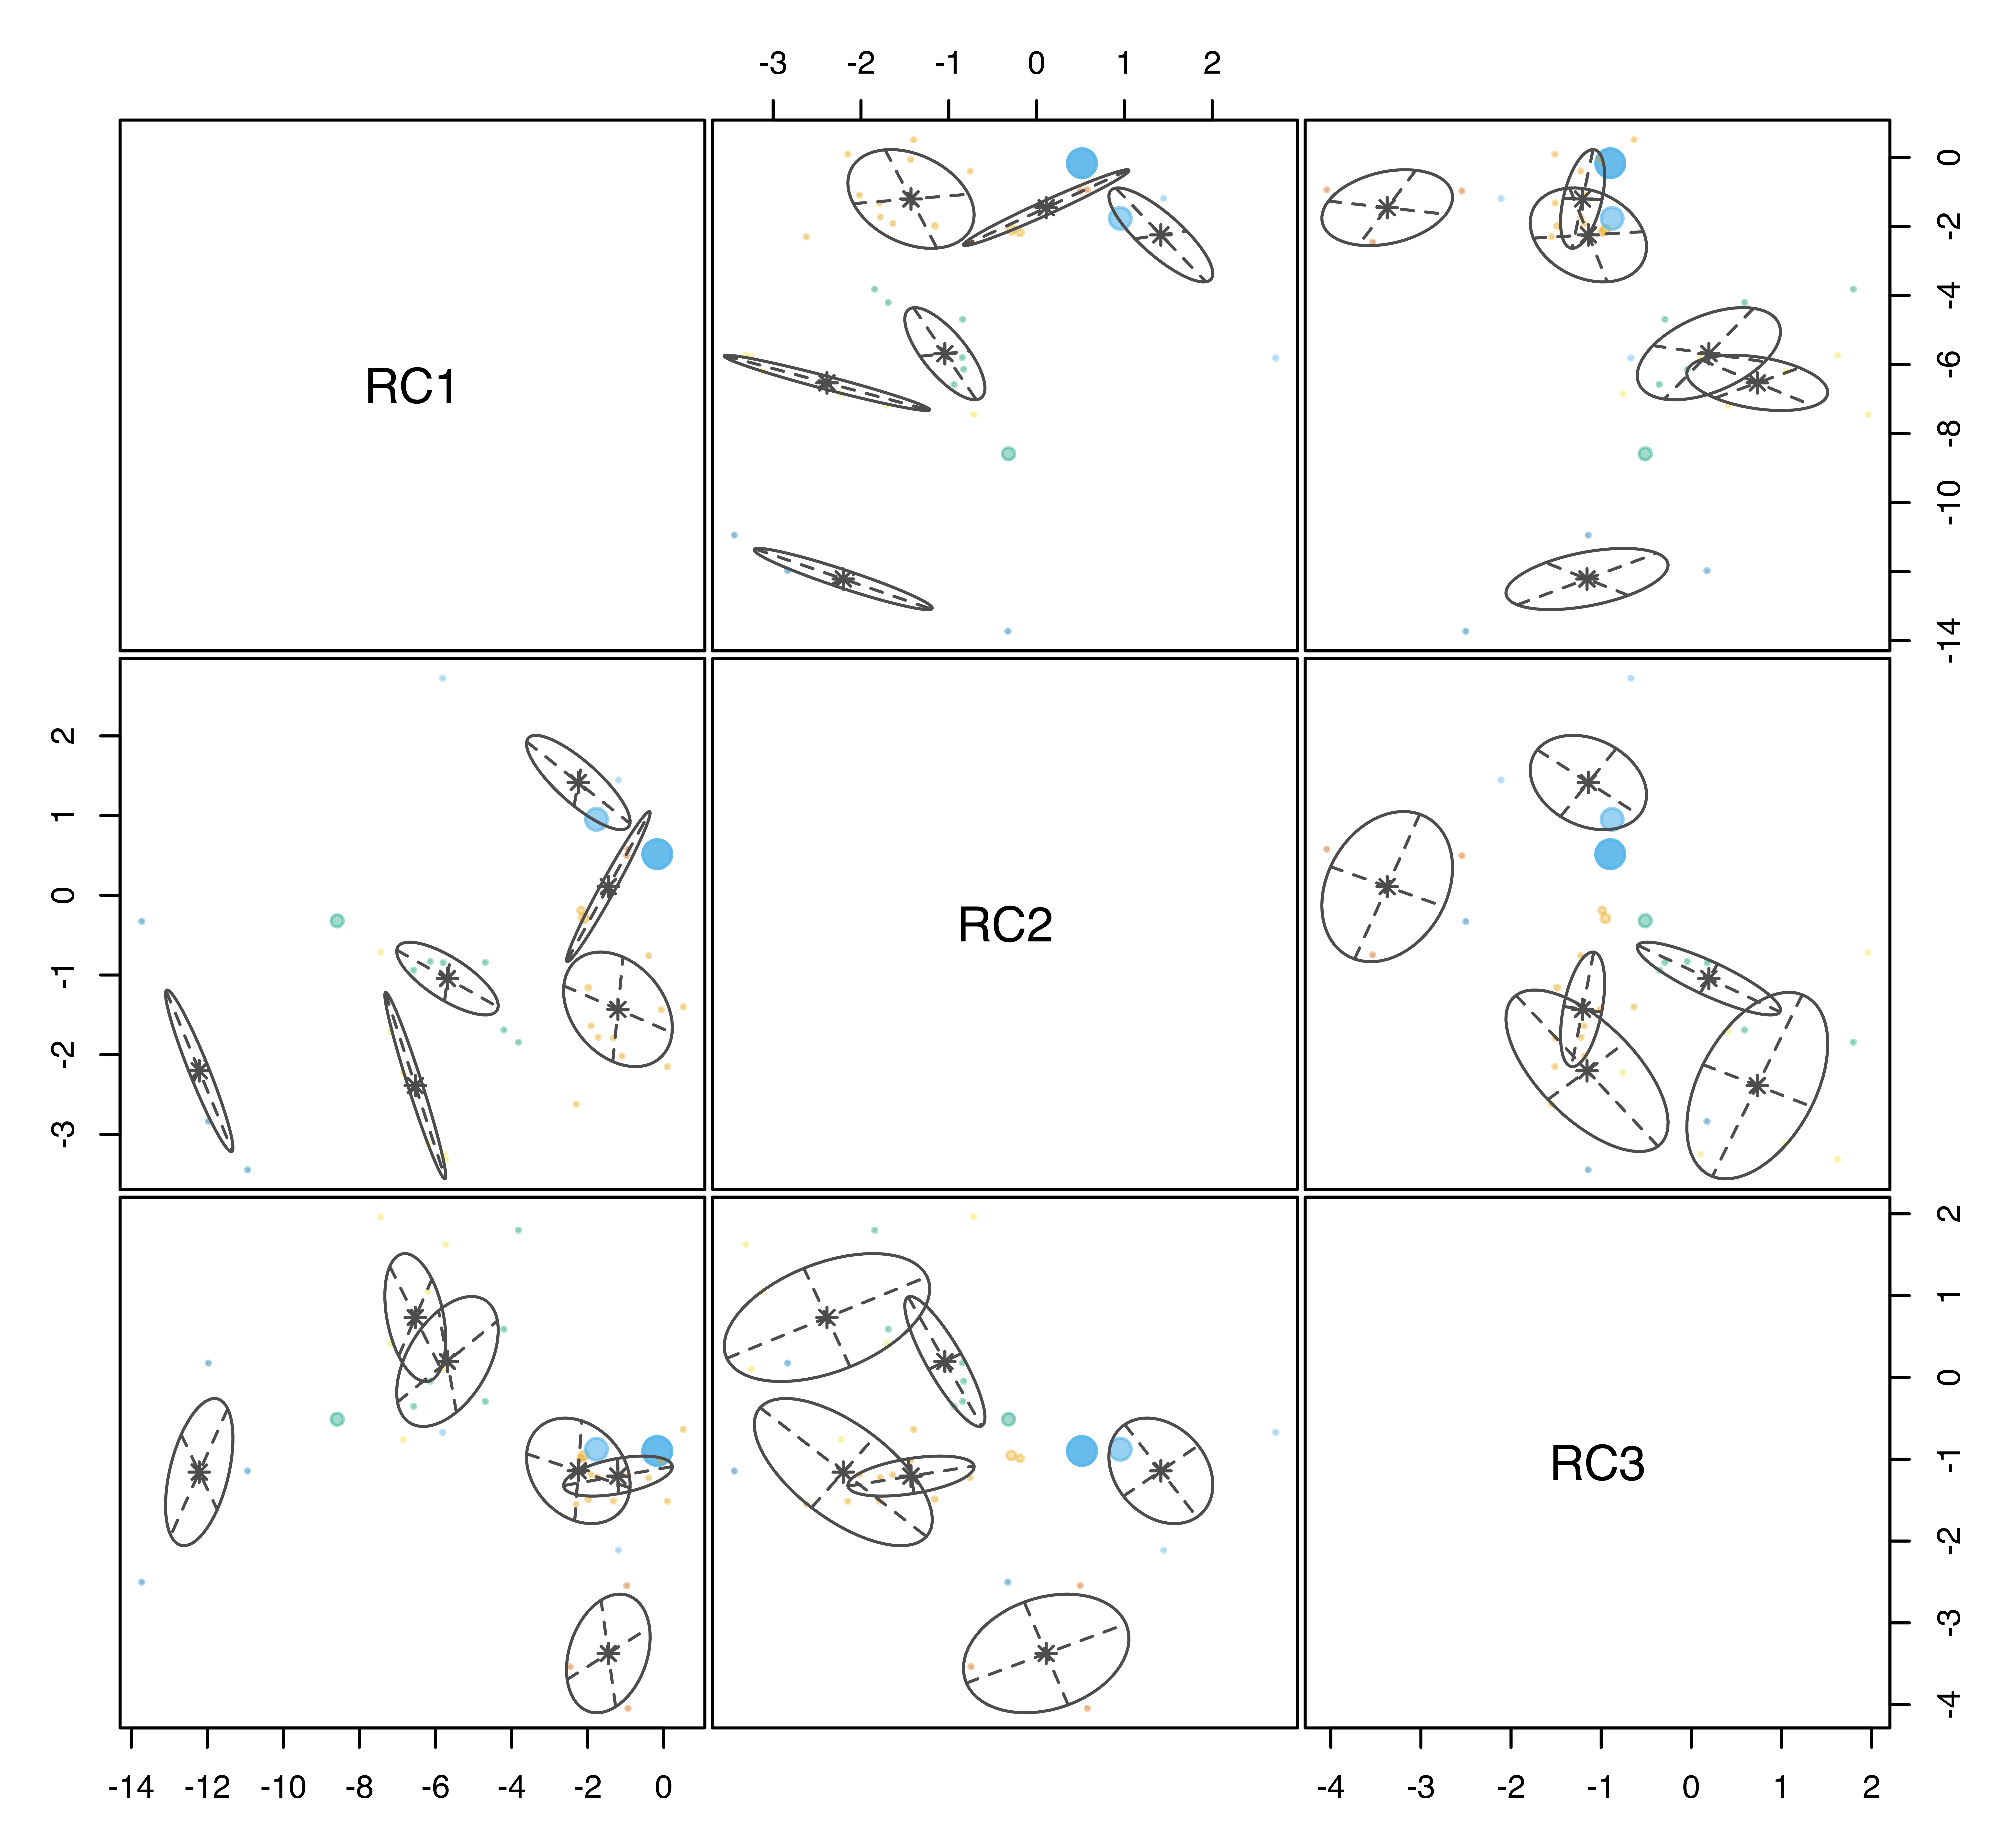


D) BIC





Supplementary Figure 7. Scatterplot of all patients clustered by rotated component scores at each timepoint.

GMM fitting results in arbitrary cluster labels at each timepoint. Therefore, phenotype labels were therefore assigned based on the position of each cluster's centroid along the principal axes of cognitive variation. RC1 explains the greatest amount of variation so was used as the primary determinant of phenotype. RC2 and 3 were used to distinguish phenotypes with similar RC1 positions.


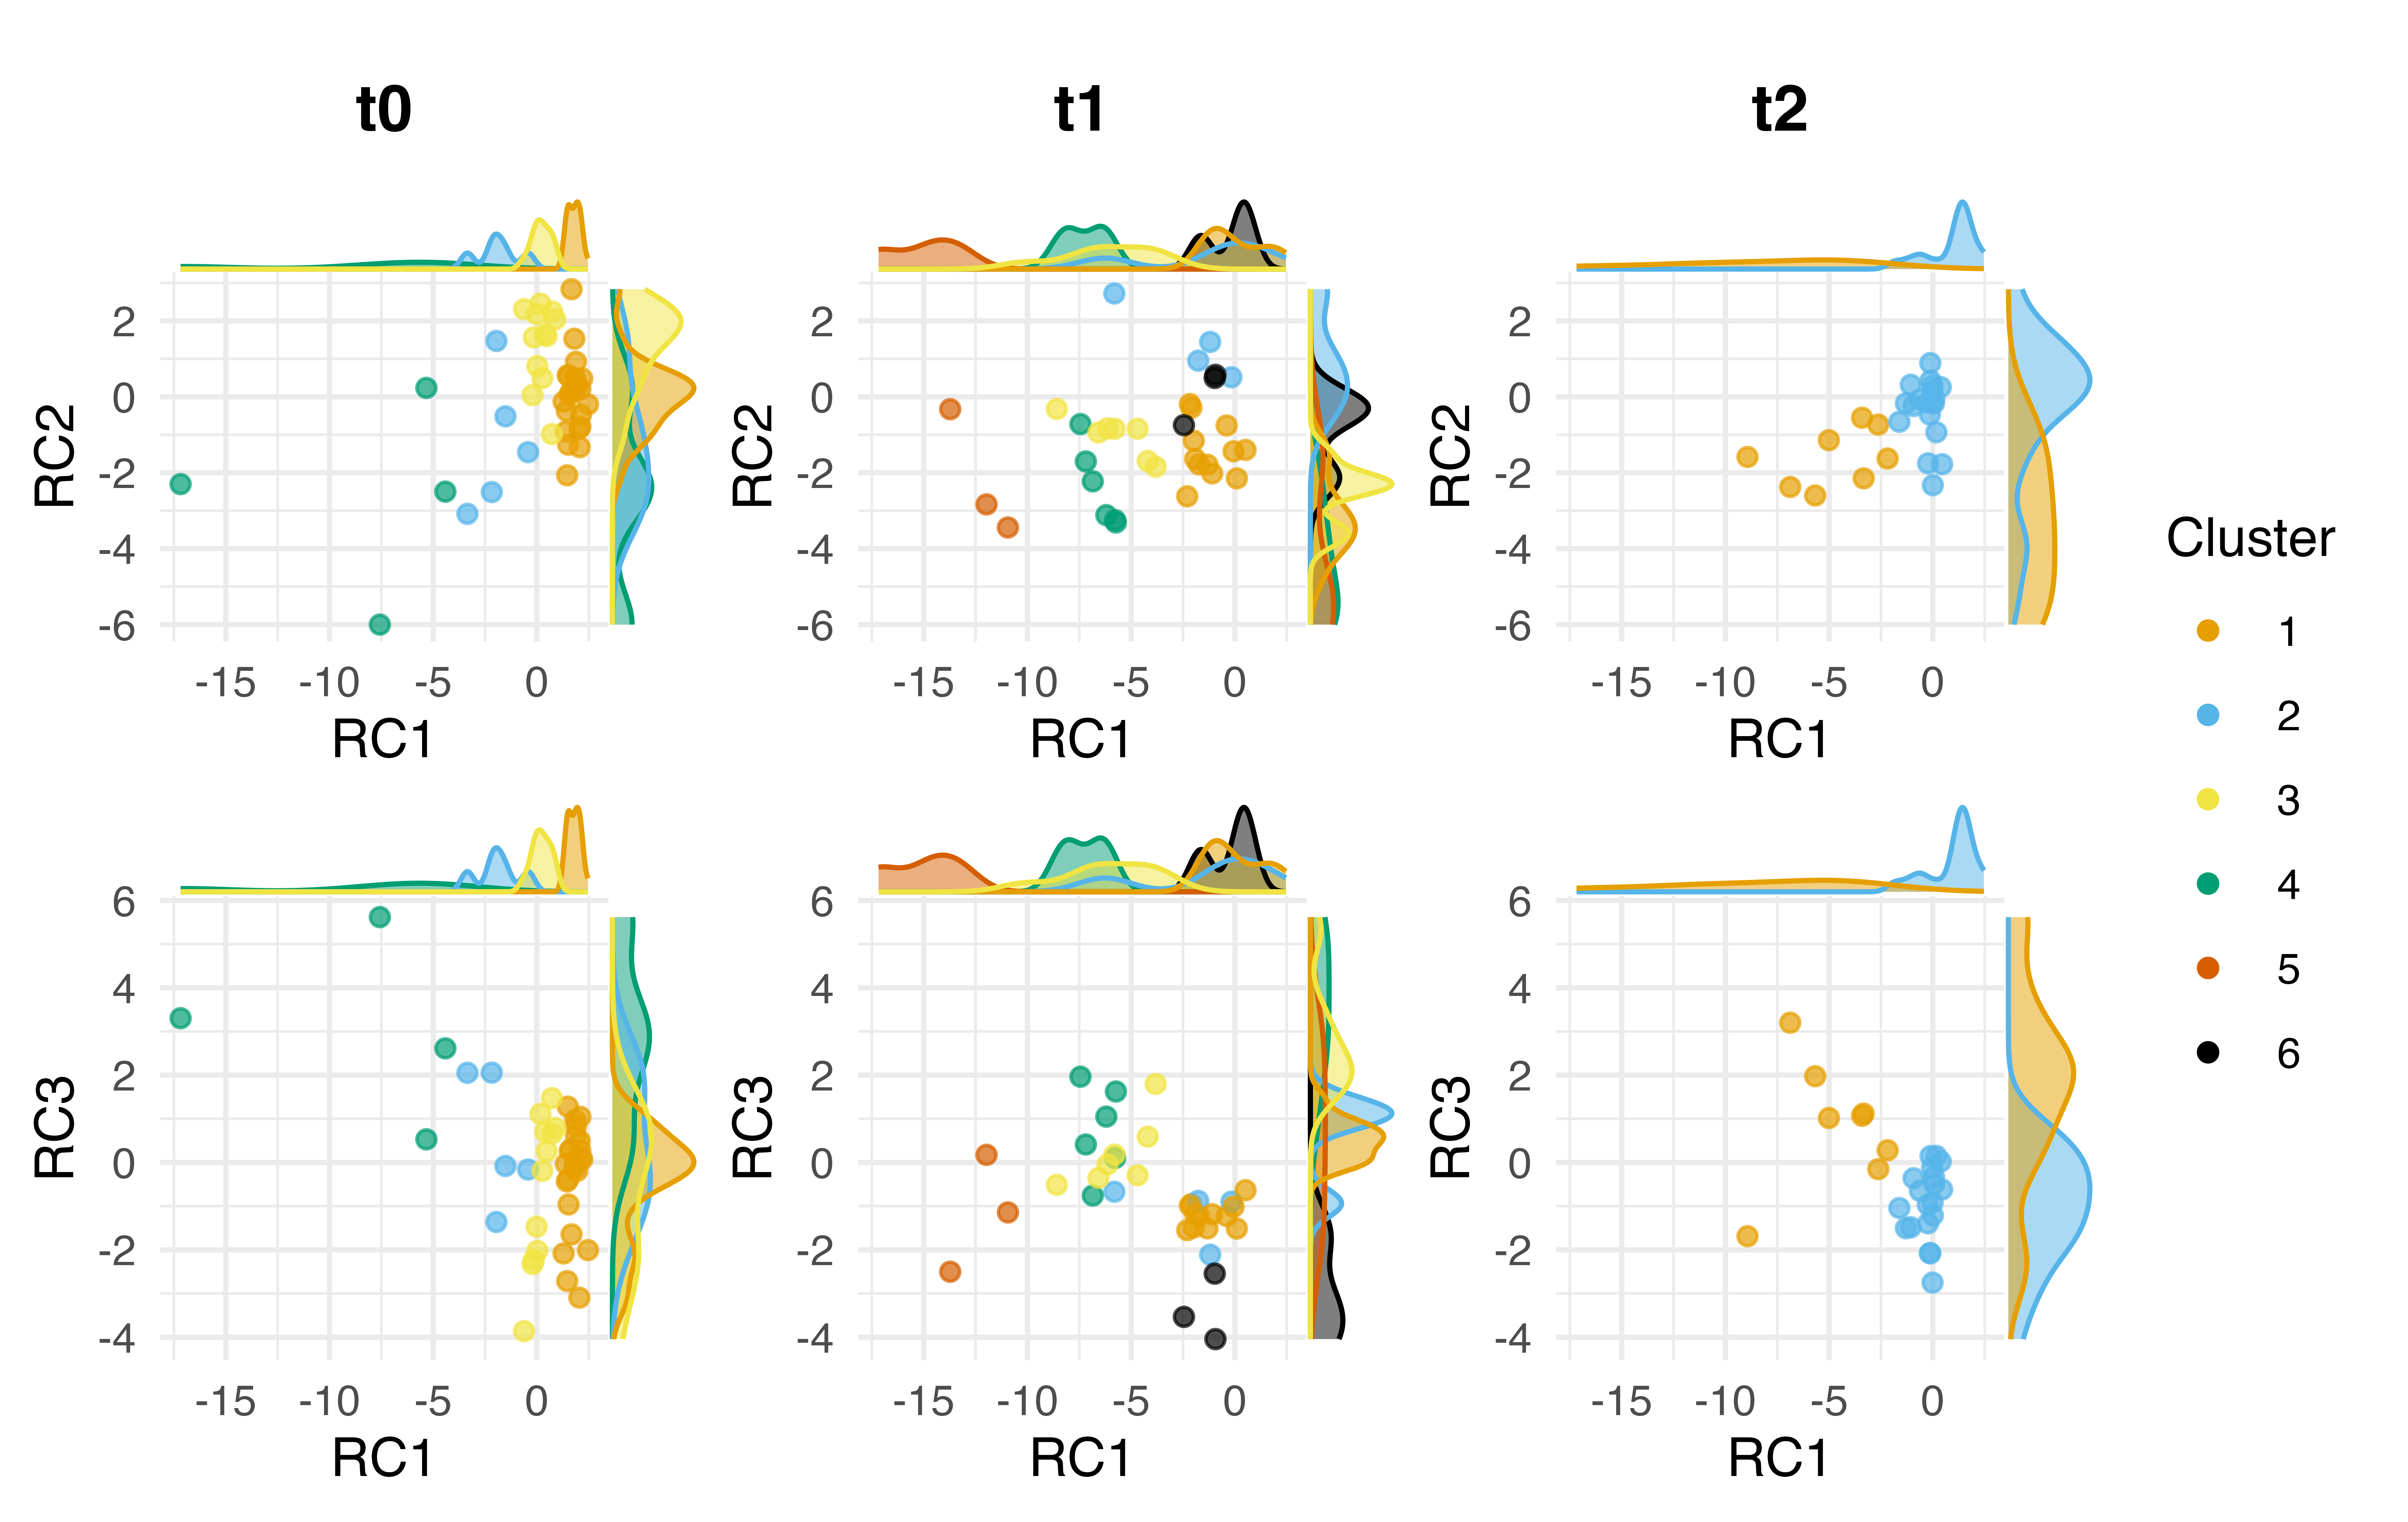


Supplementary Figure 8. Bootstrap resampling scatterplot showing original cluster centroids and resampled centroid locations, demonstrating close association of original cluster points aligned in RC1-RC2 space.





Supplementary Figure 9**.** Scatterplot of all patients clustered by cognitive phenotypes at each timepoint.





Supplementary Table 6. Cluster assignment into cognitive phenotypes. RC scores represent group centroids (mean component scores). Descriptive labels: Very low (<−8), Low (−8 to −4), Negative (−4 to −0.5), Near zero (−0.5 to 0.5), Positive (0.5 to 2), High (>2).

| Timepoint | GMM Cluster | n | RC1 (Lang., EF, Perception) | RC2 (Prosp./Retro. Memory) | RC3 (Recog./Working Memory) | Phenotype |
| --- | --- | --- | --- | --- | --- | --- |
| t0 | 1 | 23 | High (1.79) | Near zero (0.01) | Near zero (−0.32) | Minimal deficit |
| 3 | 12 | Near zero (0.22) | Positive (1.37) | Negative (−0.59) | Mild deficit |
| 2 | 5 | Negative (−1.88) | Negative (−1.22) | Positive (0.50) | Moderate deficit |
| 4 | 4 | Very low (−8.62) | Low (−2.64) | High (3.02) | Severe deficit |
| t1 | 1 | 12 | Negative (−1.20) | Negative (−1.44) | Negative (−1.21) | Mild deficit |
| 2 | 4 | Negative (−2.23) | Positive (1.41) | Negative (−1.14) | Mild deficit |
| 3 | 7 | Low (−5.69) | Negative (−1.04) | Near zero (0.19) | Moderate deficit |
| 4 | 6 | Low (−6.53) | Low (−2.39) | Positive (0.73) | Severe deficit |
| 5 | 3 | Very low (−12.20) | Low (−2.20) | Negative (−1.16) | Severe deficit |
| 6 | 3 | Negative (−1.46) | Near zero (0.11) | Very low (−3.37) | Transient deficit |
| t2 | 1 | 8 | Low (−4.76) | Negative (−1.60) | Positive (0.85) | Moderate deficit |
| 2 | 19 | Near zero (−0.28) | Near zero (−0.35) | Negative (−0.93) | Mild deficit |

Supplementary Table 7. Table showing model comparison: cluster vs baseline scores for predicting post-operative cognitive outcomes.

| Outcome | Model | df | AIC | Marginal R²a | Conditional R²b |
| --- | --- | --- | --- | --- | --- |
| Language, Executive Function and Perception | Time only (null) | 4 | 163.3 | 0.125 | 0.664 |
| Time + baseline RC scores | 7 | 148.8 | 0.431 | 0.670 |
| **Time + preoperative phenotype** | **7** | **144.8** | **0.474** | **0.687** |
| Time + baseline RC scores + cluster | 10 | 147.2 | 0.488 | 0.695 |
| Prospective and Retrospective Memory | Time only (null) | 4 | 175.6 | 0.034 | 0.441 |
| **Time + baseline RC scores** | **7** | **170.8** | **0.211** | **0.418** |
| Time + preoperative phenotype | 7 | 171.2 | 0.203 | 0.466 |
| Time + baseline RC scores + phenotype | 10 | 174.0 | 0.238 | 0.480 |
| Recognition Memory and Working Memory | Time only (null) | 4 | 154.2 | 0.016 | 0.809 |
| Time + baseline RC scores | 7 | 153.9 | 0.144 | 0.818 |
| Time + pre-operative phenotype | 7 | 152.0 | 0.166 | 0.819 |
| **Time + baseline RC scores + preoperative phenotype** | **10** | **146.3** | **0.341** | **0.824** |
| aFixed effects only | | | | | |
| bFixed + random effects | | | | | |

Supplementary Table 8. Univariable screening of demographic and clinical variables predicting postoperative cognition.

|  | RC1: Language, EF & Perception | | | RC2: Prospective & Retrospective Memory | | | RC3: Recognition & Working Memory | | |
| --- | --- | --- | --- | --- | --- | --- | --- | --- | --- |
| Variable | ΔAIC | χ² | p-value | ΔAIC | χ² | p-value | ΔAIC | χ² | p-value |
| Depression (PHQ) | **-0.89** | **2.89** | **0.089*** | 1.94 | 0.06 | 0.803 | **-5.05** | **7.05** | **0.008*** |
| Tumour lobe | 4.46 | 1.54 | 0.673 | 5.43 | 0.57 | 0.904 | **-5.58** | **11.58** | **0.009*** |
| Sex | 0.11 | 1.89 | 0.169 | **-3.01** | **5.01** | **0.025*** | 1.68 | 0.32 | 0.574 |
| Anxiety (GAD) | 1.20 | 0.80 | 0.370 | 1.93 | 0.07 | 0.792 | **-2.36** | **4.36** | **0.037*** |
| Education (years) | 1.89 | 0.11 | 0.742 | **-2.34** | **4.34** | **0.037*** | 1.98 | 0.02 | 0.879 |
| Neurophysiological monitoring | -0.28 | 2.28 | 0.131 | 1.92 | 0.08 | 0.782 | **-2.31** | **4.31** | **0.038*** |
| Age | 1.99 | 0.01 | 0.905 | -0.54 | 2.54 | 0.111 | 1.93 | 0.07 | 0.787 |
| MGMT status | 1.74 | 0.26 | 0.608 | -0.37 | 2.37 | 0.124 | 1.23 | 0.77 | 0.380 |
| IDH status | 0.00 | 2.00 | 0.157 | -0.28 | 2.28 | 0.131 | 1.95 | 0.05 | 0.822 |
| Tumour laterality | 1.99 | 0.01 | 0.923 | -0.20 | 2.20 | 0.138 | 2.00 | 0.00 | 0.958 |
| Awake surgery | 2.00 | 0.00 | 0.993 | 2.00 | 0.00 | 0.999 | 0.48 | 1.52 | 0.218 |
| Surgery type | 1.89 | 0.11 | 0.745 | 0.61 | 1.39 | 0.238 | 1.97 | 0.03 | 0.872 |
| Pre-operative AEDs | 1.05 | 0.95 | 0.329 | 1.95 | 0.05 | 0.826 | 1.46 | 0.54 | 0.463 |
| Steroids | 1.95 | 0.05 | 0.832 | 1.61 | 0.39 | 0.535 | 1.18 | 0.82 | 0.365 |
| WHO performance status | 1.86 | 0.14 | 0.706 | 1.19 | 0.81 | 0.369 | 1.52 | 0.48 | 0.491 |
| Lesion volume | 1.42 | 0.58 | 0.446 | 1.98 | 0.02 | 0.885 | 1.28 | 0.72 | 0.397 |
| FLAIR volume | 1.99 | 0.01 | 0.907 | 1.86 | 0.14 | 0.707 | 1.88 | 0.12 | 0.727 |
| Each variable was individually added to the base model and tested via likelihood ratio test. Bold = *p* < 0.1 (carried forward to multivariable selection). ΔAIC = change in AIC relative to base model (negative = improvement). | | | | | | | | | |

Supplementary Table 9**.** Baseline demographic and clinical variables predicting postoperative cognition in multivariable models. Abbreviations: AED = Antiepileptic drug; cc = cm3; FLAIR = Fluid attenuated inversion recovery; GAD = Generalized Anxiety Disorder; IDH = Isocitrate dehydrogenase; MGMT = Methylguanine-DNA methyltransferase; PHQ = Patient Health Questionnaire.

|  | RC1: Language, EF and Perception | | | RC2: Prospective and Retrospective Memory | | | RC3: Recognition and Working Memory | | |
| --- | --- | --- | --- | --- | --- | --- | --- | --- | --- |
| Characteristic | Beta | 95% CI | p-value | Beta | 95% CI | p-value | Beta | 95% CI | p-value |
| Timepoint |  |  | **<0.001** |  |  | 0.12 |  |  | **0.015** |
| t1 | — | — |  | — | — |  | — | — |  |
| t2 | 0.67 | 0.35, 0.99 |  | 0.31 | -0.10, 0.72 |  | 0.26 | 0.04, 0.48 |  |
| Pre-operative cluster |  |  | **<0.001** |  |  | **<0.001** |  |  | 0.2 |
| Minimal deficit | — | — |  | — | — |  | — | — |  |
| Mild deficit | -0.30 | -0.84, 0.23 |  | 0.05 | -0.56, 0.67 |  | -0.62 | -1.3, 0.02 |  |
| Moderate deficit | -1.2 | -1.9, -0.49 |  | -1.5 | -2.3, -0.64 |  | -0.21 | -1.3, 0.88 |  |
| Severe deficit | -1.9 | -2.8, -1.1 |  | -1.3 | -2.3, -0.32 |  | 0.12 | -0.90, 1.1 |  |
| Sex |  |  |  |  |  | **0.041** |  |  |  |
| Female |  |  |  | — | — |  |  |  |  |
| Male |  |  |  | 0.54 | 0.00, 1.1 |  |  |  |  |
| Education (years) |  |  |  | -0.06 | -0.13, 0.01 | 0.059 |  |  |  |
| Baseline depression (PHQ) |  |  |  |  |  |  | -0.05 | -0.09, -0.01 | **0.008** |
| Tumour lobe |  |  |  |  |  |  |  |  | **0.024** |
| Frontal |  |  |  |  |  |  | — | — |  |
| Occipital |  |  |  |  |  |  | 1.2 | -0.45, 2.8 |  |
| Parietal |  |  |  |  |  |  | 0.44 | -0.38, 1.3 |  |
| Temporal |  |  |  |  |  |  | 0.95 | 0.31, 1.6 |  |
| Neurophysiological monitoring |  |  |  |  |  |  |  |  | **0.019** |
| No |  |  |  |  |  |  | — | — |  |
| Yes |  |  |  |  |  |  | -0.64 | -1.2, -0.08 |  |
